# Supplementary material
Source: PubMed Central journal article supplement (PMC5076475)
Supplement: NIHMS822817-supplement-Supplemental_tables.pdf [file NIHMS822817-supplement-Supplemental_tables.pdf]

**Table S1.** Descriptive information of the forty study households that raised guinea pigs for food in a semi-urban parish of Quito, Ecuador.

| <b>Guinea pig management practices among households surveyed</b> | <b>No. (% or range)</b> |
|------------------------------------------------------------------|-------------------------|
| Average number of guinea pigs raised by each household (range)   | 12 (2-40)               |
| Guinea pigs raised in a cage outside home                        | 40 (100%)               |
| Household reuses litter on property                              | 40 (100%)               |
| Household stores litter prior to land application                | 5 (12.5%)               |
| Household allows guinea pig(s) in kitchen area                   | 0 (0%)                  |
| Guinea pig(s) defecate in area where child can be exposed        | 1 (2.5%)                |
| Household uses medicated feed                                    | 4 (10%)                 |

**Table S2.** Prevalence ratio of *Campylobacter jejuni* carriage among domestic animals from a semi-rural parish of Quito, Ecuador

| Comparison           | Prevalence ratio <sup>a</sup> | 95% CI <sup>b</sup> |
|----------------------|-------------------------------|---------------------|
| Guinea pigs–Chickens | 1.2                           | 0.89 – 1.67         |
| Guinea pigs–Dogs     | 2.9                           | <b>1.64–5.14</b>    |
| Guinea pigs–Pigs     | 8.7                           | <b>2.90–26.14</b>   |
| Guinea pigs–Rabbits  | 7.3                           | <b>1.92–27.37</b>   |
| Chickens–Dogs        | 2.4                           | <b>1.32–4.30</b>    |
| Chickens–Pigs        | 7.1                           | <b>2.35–21.71</b>   |
| Chickens–Rabbits     | 6.0                           | <b>1.56–22.69</b>   |
| Dogs–Pigs            | 3.0                           | 0.90–10.05          |
| Dogs–Rabbits         | 2.5                           | 0.60–10.34          |
| Rabbits–Pigs         | 1.2                           | 0.22–6.59           |

<sup>a</sup>A ratio greater than 1.0 indicates a higher prevalence of *C. jejuni* in the first animal type listed under the comparison column.

<sup>b</sup> The bolded confidence intervals indicate that the differences are statistically significant.

**Fig. S1.** Guinea pigs contained six alleles (aspA 4, glnA 7, glyA 62, pgm 13, uncA 104 and tkt25) that were previously reported in other animal species (based on the pubMLST database).
